# Supplementary figures and images for: Evaluation of the Societal Burden of Rare Diseases in the United States
Source: Research Square preprint supplement (doi:10.21203/rs.3.rs-936611/v1), 2021-10-11

**Additional file 2. Table S2.** Selected rare diseases across therapeutic areas


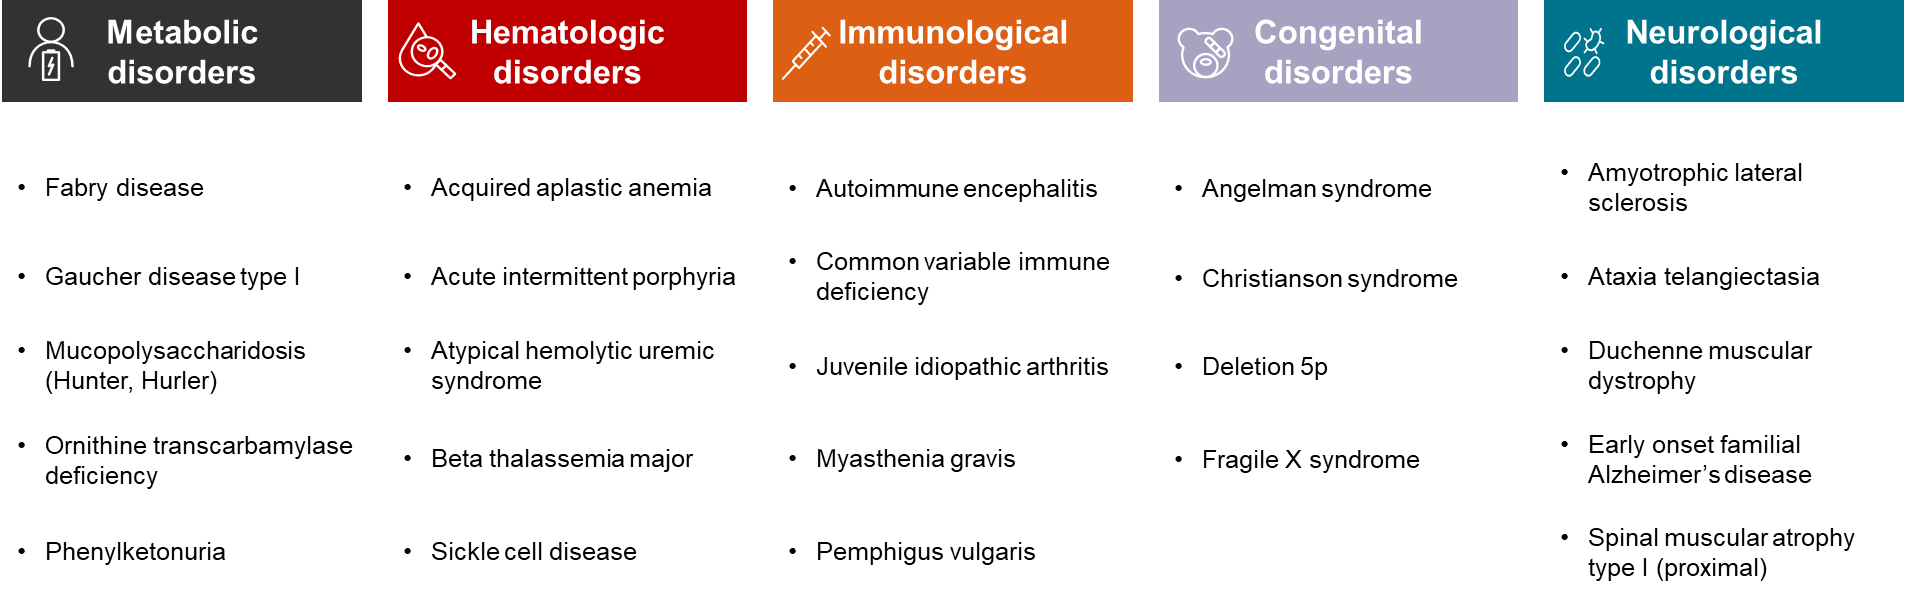

Supplement: Supplementary file 1 [file b90c2f7cb8dacd3809f34910.docx]
